# Supplementary material for: Combined changes in albuminuria and kidney function and subsequent risk for kidney failure in type 2 diabetes
Source: PubMed Central journal article supplement — BMJ Open Diabetes Res Care. 2021 Jun 30;9(1):e002311. doi: 10.1136/bmjdrc-2021-002311 (PMC8246293; doi:10.1136/bmjdrc-2021-002311), 2021-06-30
Supplement: bmjdrc-2021-002311supp001.pdf [file bmjdrc-2021-002311supp001.pdf]

**Supplementary Figure 1: Flow chart of the study cohort**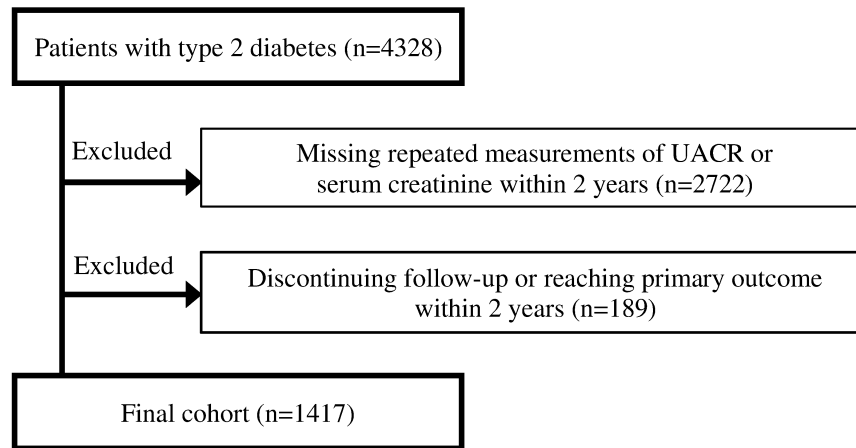

**Supplementary Figure 2: Distribution of percentage changes in UACR (a) and annual changes in eGFR (b) over 2 years**

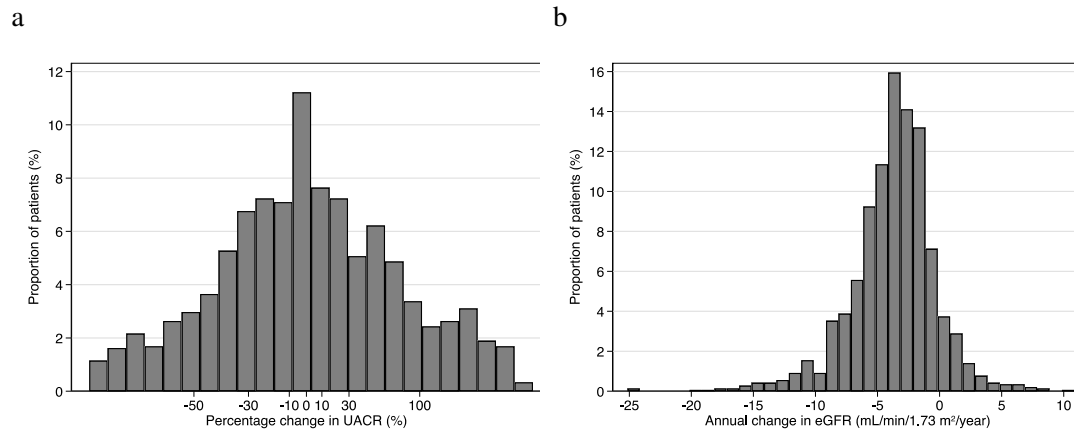

**Supplementary Figure 3: Scatter plots of annual changes in eGFR and percentage (a) and absolute (b) changes in UACR over 2 years**

**a**

$$|r| = 0.05, p = 0.06$$

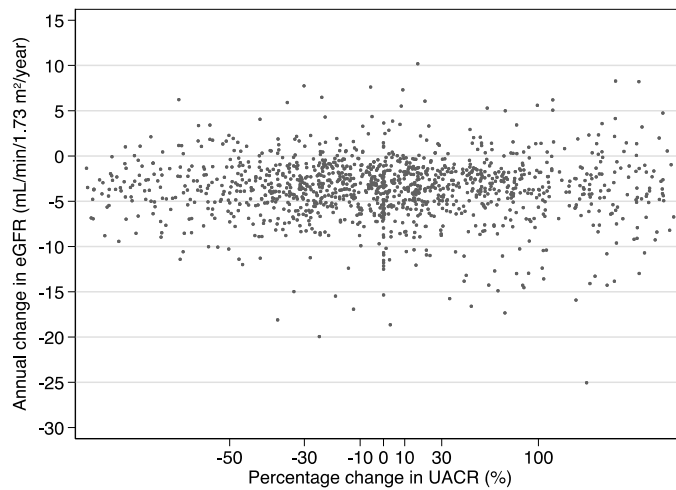

**b**

$$|r| = 0.05, p = 0.06$$

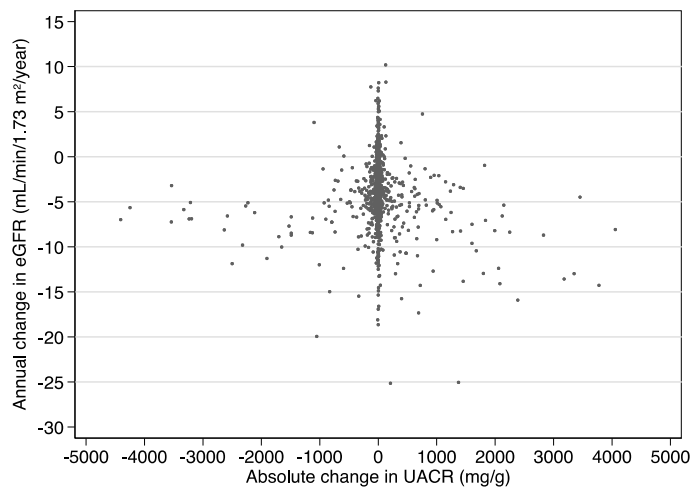

Correlations between the changes in UACR and eGFR were tested using Pearson's correlation coefficient.

**Supplementary Table 1: Adjusted odds ratios (95% CIs) of baseline patient characteristics for a >30% increase in UACR and a substantial decline in eGFR (>5 mL/min/1.73 m<sup>2</sup>/year) over 2 years**

|                                                                            | <b>Odds ratio (95% CI)</b> | <b>P</b> |
|----------------------------------------------------------------------------|----------------------------|----------|
| <b>&gt;30% increase in UACR</b>                                            |                            |          |
| Male (versus female)                                                       | 1.14 (0.90–1.43)           | 0.28     |
| Age (per 10 years)                                                         | 0.87 (0.78–0.98)           | 0.018    |
| History of cardiovascular disease (versus no history)                      | 1.19 (0.81–1.75)           | 0.37     |
| HbA1c (per 1 percentage)                                                   | 1.12 (1.05–1.20)           | 0.001    |
| Systolic blood pressure (per 10 mmHg)                                      | 0.96 (0.90–1.02)           | 0.16     |
| Log-transformed UACR (per 1 log(mg/g))                                     | 0.88 (0.82–0.94)           | <0.001   |
| eGFR (per 10 mL/min/1.73 m <sup>2</sup> )                                  | 0.91 (0.86–0.96)           | 0.001    |
| <b>Substantial decline in eGFR (&gt; 5 mL/min/1.73 m<sup>2</sup>/year)</b> |                            |          |
| Male (versus female)                                                       | 0.81 (0.62–1.05)           | 0.11     |
| Age (per 10 years)                                                         | 1.20 (1.06–1.35)           | 0.005    |
| History of cardiovascular disease (versus no history)                      | 1.11 (0.72–1.71)           | 0.63     |
| HbA1c (per 1 percentage)                                                   | 1.18 (1.09–1.27)           | <0.001   |
| Systolic blood pressure (per 10 mmHg)                                      | 0.96 (0.90–1.03)           | 0.23     |
| Log-transformed UACR (per 1 log(mg/g))                                     | 1.77 (1.62–1.93)           | <0.001   |
| eGFR (per 10 mL/min/1.73 m <sup>2</sup> )                                  | 1.30 (1.22–1.38)           | <0.001   |

Adjusted for sex, age, history of cardiovascular disease, and baseline covariates including HbA1c, systolic blood pressure, log-transformed UACR, and eGFR.

**Supplementary Table 2: Subgroup analysis of adjusted hazard ratios (95% CIs) for ESKD by percentage changes in UACR and annual changes in eGFR over 2 years**

|                                           | Percentage change in UACR | n/N (%)     | Event rates per 1000 patient-years | HR (95% CI)       | P for interaction | Annual change in eGFR                                     | n/N (%)     | Event rates per 1000 patient-years | HR (95% CI)       | P for interaction |
|-------------------------------------------|---------------------------|-------------|------------------------------------|-------------------|-------------------|-----------------------------------------------------------|-------------|------------------------------------|-------------------|-------------------|
| Age (years)<br><60                        | Decline >30%              | 13/164 (8)  | 10.8                               | 0.42 (0.21–0.87)  | 0.89              | Substantial decline (>5 mL/min/1.73 m <sup>2</sup> /year) | 57/205 (28) | 51.8                               | 9.69 (2.16–43.6)  | 0.34              |
|                                           | Minor change              | 28/258 (11) | 15.6                               | 1.00 (reference)  |                   | Decline (2.5–5 mL/min/1.73 m <sup>2</sup> /year)          | 14/191 (7)  | 10.4                               | 5.53 (1.23–24.9)  |                   |
|                                           | Increase >30%             | 32/217 (15) | 23.1                               | 2.07 (1.18–3.63)  |                   | eGFR minor change (<2.5 mL/min/1.73 m <sup>2</sup> /year) | 2/243 (0.8) | 1.0                                | 1.00 (reference)  |                   |
| ≥60                                       | Decline >30%              | 15/243 (6)  | 9.8                                | 0.58 (0.28–1.19)  |                   | Substantial decline (>5 mL/min/1.73 m <sup>2</sup> /year) | 31/214 (14) | 29.0                               | 2.61 (0.95–7.18)  |                   |
|                                           | Minor change              | 18/292 (6)  | 9.6                                | 1.00 (reference)  |                   | Decline (2.5–5 mL/min/1.73 m <sup>2</sup> /year)          | 19/306 (6)  | 10.1                               | 2.11 (0.82–5.41)  |                   |
|                                           | Increase >30%             | 23/243 (9)  | 16.9                               | 3.06 (1.54–6.06)  |                   | eGFR minor change (<2.5 mL/min/1.73 m <sup>2</sup> /year) | 6/258 (2)   | 3.3                                | 1.00 (reference)  |                   |
| Sex<br>Male                               | Decline >30%              | 16/213 (8)  | 11.3                               | 0.38 (0.20–0.70)  | 0.63              | Substantial decline (>5 mL/min/1.73 m <sup>2</sup> /year) | 61/227 (27) | 53.6                               | 3.97 (1.41–11.17) | 0.47              |
|                                           | Minor change              | 38/321 (12) | 18.4                               | 1.00 (reference)  |                   | Decline (2.5–5 mL/min/1.73 m <sup>2</sup> /year)          | 23/283 (8)  | 12.7                               | 3.17 (1.18–8.49)  |                   |
|                                           | Increase >30%             | 35/268 (13) | 21.6                               | 2.25 (1.37–3.71)  |                   | eGFR minor change (<2.5 mL/min/1.73 m <sup>2</sup> /year) | 5/292 (2)   | 2.3                                | 1.00 (reference)  |                   |
| Female                                    | Decline >30%              | 12/194 (6)  | 9.1                                | 0.67 (0.26–1.75)  |                   | Substantial decline (>5 mL/min/1.73 m <sup>2</sup> /year) | 27/192 (14) | 26.2                               | 5.33 (1.41–20.2)  |                   |
|                                           | Minor change              | 8/229 (3)   | 5.0                                | 1.00 (reference)  |                   | Decline (2.5–5 mL/min/1.73 m <sup>2</sup> /year)          | 10/214 (5)  | 7.0                                | 2.37 (0.61–9.10)  |                   |
|                                           | Increase >30%             | 20/192 (10) | 17.8                               | 2.81 (1.14–6.91)  |                   | eGFR minor change (<2.5 mL/min/1.73 m <sup>2</sup> /year) | 3/209 (1)   | 1.9                                | 1.00 (reference)  |                   |
| eGFR (mL/min/1.73 m <sup>2</sup> )<br>≥60 | Decline >30%              | 6/328 (2)   | 2.6                                | 0.27 (0.09–0.77)  | 0.026             | Substantial decline (>5 mL/min/1.73 m <sup>2</sup> /year) | 38/325 (12) | 20.5                               | 6.43 (2.09–19.80) | 0.034             |
|                                           | Minor change              | 16/459 (3)  | 4.9                                | 1.00 (reference)  |                   | Decline (2.5–5 mL/min/1.73 m <sup>2</sup> /year)          | 12/397 (3)  | 4.4                                | 3.58 (1.13–11.32) |                   |
|                                           | Increase >30%             | 32/365 (9)  | 14.0                               | 4.06 (2.13–2.75)  |                   | eGFR minor change (<2.5 mL/min/1.73 m <sup>2</sup> /year) | 4/430 (0.9) | 1.2                                | 1.00 (reference)  |                   |
| <60                                       | Decline >30%              | 22/79 (28)  | 56.0                               | 0.61 (0.34–1.10)  |                   | Substantial decline (>5 mL/min/1.73 m <sup>2</sup> /year) | 50/94 (53)  | 158.7                              | 3.81 (1.18–12.3)  |                   |
|                                           | Minor change              | 30/91 (33)  | 78.3                               | 1.00 (reference)  |                   | Decline (2.5–5 mL/min/1.73 m <sup>2</sup> /year)          | 21/100 (21) | 40.2                               | 2.25 (0.74–6.83)  |                   |
|                                           | Increase >30%             | 23/95 (24)  | 49.5                               | 1.95 (1.02–3.72)  |                   | eGFR minor change (<2.5 mL/min/1.73 m <sup>2</sup> /year) | 4/71 (6)    | 9.9                                | 1.00 (reference)  |                   |
| UACR (mg/g)<br><30                        | Decline >30%              | 1/188 (0.5) | 0.7                                | 0.72 (0.06–8.63)  | 0.70              | Substantial decline (>5 mL/min/1.73 m <sup>2</sup> /year) | 2/192 (1)   | 1.8                                | 3.67 (0.40–33.33) | 0.63              |
|                                           | Minor change              | 2/373 (0.5) | 0.7                                | 1.00 (reference)  |                   | Decline (2.5–5 mL/min/1.73 m <sup>2</sup> /year)          | 4/313 (1)   | 2.0                                | 4.45 (0.70–28.16) |                   |
|                                           | Increase >30%             | 5/287 (2)   | 2.7                                | 2.99 (0.54–16.46) |                   | eGFR minor change (<2.5 mL/min/1.73 m <sup>2</sup> /year) | 2/343 (10)  | 0.7                                | 1.00 (reference)  |                   |
| 30–<300                                   | Decline >30%              | 5/147 (3)   | 5.0                                | 0.64 (0.18–2.27)  |                   | Substantial decline                                       | 10/96 (10)  | 18.5                               | 8.26 (2.06–33.16) |                   |

|      |               |             |       |                  |                                                              |             |       |                   |
|------|---------------|-------------|-------|------------------|--------------------------------------------------------------|-------------|-------|-------------------|
|      |               |             |       |                  | (>5 mL/min/1.73 m <sup>2</sup> /year)                        |             |       |                   |
|      | Minor change  | 5/98 (5)    | 7.5   | 1.00 (reference) | Decline<br>(2.5-5 mL/min/1.73 m <sup>2</sup> /year)          | 11/133 (8)  | 11.8  | 2.54 (0.67–9.34)  |
|      | Increase >30% | 14/114 (12) | 19.7  | 1.50 (0.50–4.51) | eGFR minor change<br>(<2.5 mL/min/1.73 m <sup>2</sup> /year) | 3/130 (2)   | 3.3   | 1.00 (reference)  |
| ≥300 | Decline >30%  | 22/72 (31)  | 57.1  | 0.43 (0.25–0.77) | Substantial decline<br>(>5 mL/min/1.73 m <sup>2</sup> /year) | 76/131 (58) | 154.2 | 3.43 (1.03–11.37) |
|      | Minor change  | 39/79 (49)  | 123.8 | 1.00 (reference) | Decline<br>(2.5-5 mL/min/1.73 m <sup>2</sup> /year)          | 18/51 (35)  | 68.2  | 2.28 (0.64–8.05)  |
|      | Increase >30% | 36/59 (61)  | 173.1 | 2.30 (1.36–3.86) | eGFR minor change<br>(<2.5 mL/min/1.73 m <sup>2</sup> /year) | 3/28 (11)   | 19.9  | 1.00 (reference)  |

Adjusted for sex, age, history of cardiovascular disease, and baseline covariates including HbA1c, systolic blood pressure, log-transformed UACR, and eGFR, and stratified with institution.

**Supplementary Table 3: Adjusted hazard ratios (95% CIs) for ESKD and ESKD or death by percentage changes in UACR and annual changes in eGFR over 2 years**

|               |                                                                   | n/N (%)      | Event rates per<br>1000 patient-years | HR (95% CI)      | P      | P for trend |
|---------------|-------------------------------------------------------------------|--------------|---------------------------------------|------------------|--------|-------------|
| ESKD          | UACR decline >30%                                                 | 28/407 (7)   | 10.2                                  | 0.47 (0.29–0.77) | 0.003  | <0.001      |
|               | UACR minor change                                                 | 46/550 (8)   | 12.5                                  | 1.00 (reference) |        |             |
|               | UACR increase >30%                                                | 55/460 (12)  | 20.0                                  | 2.31 (1.52–3.51) | <0.001 |             |
| ESKD or death | UACR decline >30%                                                 | 51/407 (13)  | 18.6                                  | 0.60 (0.42–0.87) | 0.008  | <0.001      |
|               | UACR minor change                                                 | 73/550 (13)  | 19.9                                  | 1.00 (reference) |        |             |
|               | UACR increase >30%                                                | 80/460 (17)  | 29.1                                  | 1.68 (1.21–2.33) | 0.002  |             |
|               |                                                                   | n/N (%)      | Event rates per<br>1000 patient-years | HR (95% CI)      | P      | P for trend |
| ESKD          | eGFR substantial decline<br>(>5 mL/min/1.73 m <sup>2</sup> /year) | 88/419 (21)  | 40.6                                  | 4.19 (1.87–9.38) | <0.001 | <0.001      |
|               | eGFR decline<br>(2.5–5 mL/min/1.73 m <sup>2</sup> /year)          | 33/497 (7)   | 10.2                                  | 2.89 (1.32–6.33) | 0.008  |             |
|               | eGFR minor change<br>(<2.5 mL/min/1.73 m <sup>2</sup> /year)      | 8/501 (2)    | 2.1                                   | 1.00 (reference) |        |             |
| ESKD or death | eGFR substantial decline<br>(>5 mL/min/1.73 m <sup>2</sup> /year) | 102/419 (24) | 47.0                                  | 1.97 (1.25–3.11) | 0.003  | 0.003       |
|               | eGFR decline<br>(2.5–5 mL/min/1.73 m <sup>2</sup> /year)          | 66/497 (13)  | 20.4                                  | 1.47 (0.97–2.22) | 0.07   |             |
|               | eGFR minor change<br>(<2.5 mL/min/1.73 m <sup>2</sup> /year)      | 36/501 (7)   | 9.6                                   | 1.00 (reference) |        |             |

Adjusted for sex, age, history of cardiovascular disease, and baseline covariates including HbA1c, systolic blood pressure, log-transformed UACR, and eGFR, and stratified with institution.

**Supplementary Table 4 : Adjusted hazard ratios (95% CIs) for ESKD by additional categories of changes in UACR over 2 years**

|                                                | n/N (%)      | Event rates per 1000 patient-years | HR (95% CI)      | P      | P for trend |
|------------------------------------------------|--------------|------------------------------------|------------------|--------|-------------|
| <b>Percentage changes in UACR</b>              |              |                                    |                  |        |             |
| UACR decline >30%                              | 28/407 (7)   | 10.2                               | 0.47 (0.29–0.76) | 0.002  | <0.001      |
| UACR decline ≤30% to increase ≤43%             | 49/597 (8)   | 12.3                               | 1.00 (reference) |        |             |
| UACR increase >43%                             | 52/413 (13)  | 22.5                               | 2.46 (1.62–3.74) | <0.001 |             |
| <b>Absolute changes in UACR<sup>*1</sup></b>   |              |                                    |                  |        |             |
| UACR decline (<-3.7 mg/g)                      | 49/474 (10)  | 15.5                               | 0.84 (0.42–1.67) | 0.61   | <0.001      |
| UACR minor change (-3.7 to 3.7 mg/g)           | 11/471 (2)   | 3.4                                | 1.00 (reference) |        |             |
| UACR increase (≥3.7 mg/g)                      | 69/472 (15)  | 24.70                              | 2.33 (1.23–4.44) | 0.01   |             |
| <b>Progression of albuminuria<sup>*2</sup></b> |              |                                    |                  |        |             |
| Yes                                            | 12/66 (18)   | 32.3                               | 2.86 (1.16–7.00) | 0.02   |             |
| No                                             | 20/1141 (2)  | 2.5                                | 1.00 (reference) |        |             |
| <b>Regression of albuminuria<sup>*3</sup></b>  |              |                                    |                  |        |             |
| Yes                                            | 9/128 (7)    | 10.6                               | 0.56 (0.28–1.14) | 0.11   |             |
| No                                             | 112/441 (25) | 46.0                               | 1.00 (reference) |        |             |

Adjusted for sex, age, history of cardiovascular disease, and baseline covariates including HbA1c, systolic blood pressure, log-transformed UACR, and eGFR, and stratified with institution.

<sup>\*1</sup> Patients were divided into three categories using the tertiles of the absolute changes in UACR over 2 years.

<sup>\*2</sup> Progression of albuminuria was defined as a UACR increase from <30 to ≥30 mg/g or from 30-<300 to ≥300 mg/g.

<sup>\*3</sup> Regression of albuminuria was defined as a UACR decrease from ≥30 to <30 mg/g or from ≥300 to <300 mg/g.



**Supplementary Table 5 : Adjusted hazard ratios (95% CIs) for ESKD by the percentage changes in eGFR over 2 years**

|                                   | n/N (%)     | Event rates per<br>1000 patient-years | HR (95% CI)      | P    | P for trend |
|-----------------------------------|-------------|---------------------------------------|------------------|------|-------------|
| <b>Percentage changes in eGFR</b> |             |                                       |                  |      |             |
| eGFR decline >30%                 | 67/154 (44) | 114.1                                 | 2.73 (1.26–5.89) | 0.01 | 0.003       |
| eGFR decline >0 to 30%            | 52/919 (6)  | 8.5                                   | 1.38 (0.69–2.77) | 0.37 |             |
| eGFR increase $\geq$ 0%           | 10/344 (3)  | 4.1                                   | 1.00 (reference) |      |             |

Adjusted for sex, age, history of cardiovascular disease, and baseline covariates including HbA1c, systolic blood pressure, log-transformed UACR, and eGFR, and stratified with institution.
